# Supplementary material for: Longitudinal investigation of neuroinflammation and metabolite profiles in the APP swe×PS1Δe9 transgenic mouse model of Alzheimer's disease
Source: PubMed Central journal article supplement (PMC5846890; doi:10.1111/jnc.14251), 2017-12-15
Supplement: JNC-144-318-s001.pdf [file JNC-144-318-s001.pdf]

# Longitudinal investigation <sup>1</sup> of neuroinflammation and metabolite profiles in the APP<sub>swe</sub>×PS1<sub>Δe9</sub> transgenic mouse model of Alzheimer's disease.

Chaney A.<sup>1,2\*</sup>, Bauer M.<sup>3†</sup>, Bochicchio D.<sup>2†</sup>, Smigova A.<sup>1,2</sup>, Kassiou M.<sup>4</sup>, Davies K.E.<sup>1,4</sup>,  
Williams S.R.<sup>1</sup>, Boutin H.<sup>1,2</sup>.

<sup>1</sup> Centre for Imaging Science, Faculty of Biology, Medicine and Health and Manchester Academic Health Sciences Centre University of Manchester, Manchester, M13 9PT, UK

<sup>2</sup> Wolfson Molecular Imaging Centre, Faculty of Biology, Medicine and Health and Manchester Academic Health Sciences Centre, University of Manchester, Manchester, M20 3LJ, UK.

<sup>3</sup> Medical University Vienna, Department of Clinical Pharmacology, Waehringer Guertel 18-20, 1090 Vienna, Austria.

<sup>4</sup> School of Chemistry, University of Sydney, NSW 2006 Australia.

† Contributed equally to the work

\* Current address: 3165 Porter Drive, Stanford University, Palo Alto, CA, 94304.

Corresponding Author:

Dr Hervé Boutin,

Wolfson Molecular Imaging Centre,

27 Palatine Road, Manchester, M20 3LJ, UK

Email: [herve.boutin@manchester.ac.uk](mailto:herve.boutin@manchester.ac.uk)

Tel: +44 161 275 0078

Fax: +44 161 275 0003

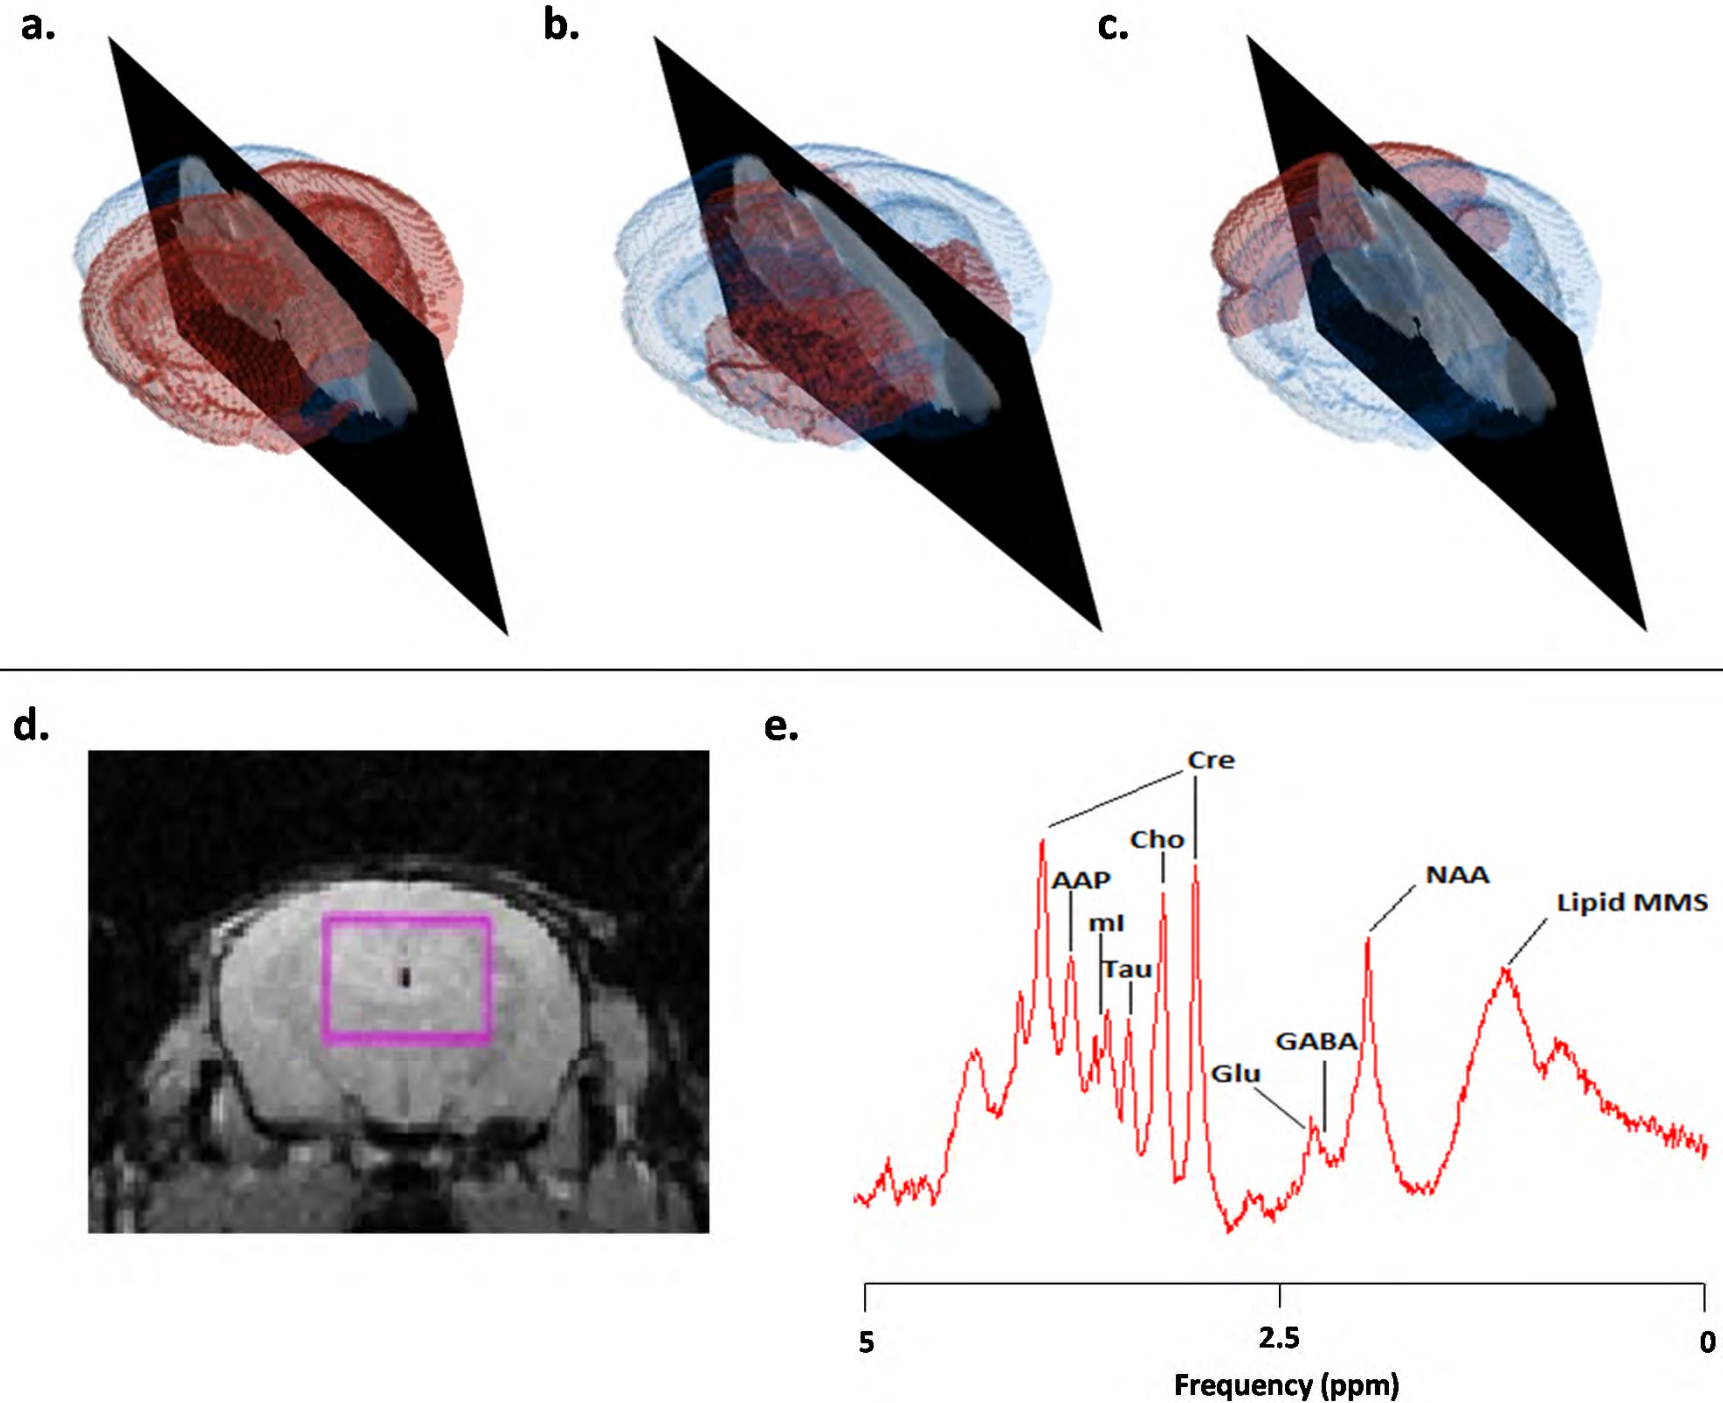

**Supplementary figure 1:** Whole brain was segmented into the hippocampus and cortex (a), other subcortical (b) and cerebellum (c) regions of interest for PET quantification using a modified version of the Waxholm space template (Johnson et al. 2010). The MRS voxel was centred at bregma -2.30mm according to the Paxinos mouse brain atlas and encompassed hippocampal and thalamic regions (d). Example of an MRS spectrum *in vivo* with the main metabolites highlighted (e). AAP-amino acid proton, ml-myo-Inositol. Tau-taurine, Cho-choline containing compounds, Cre- creatine+phosphocreatine, Glu- glutamate, GABA-  $\gamma$ -aminobutyric acid, NAA- N-acetylaspartate, Lipid MMS- lipid and macromolecules.

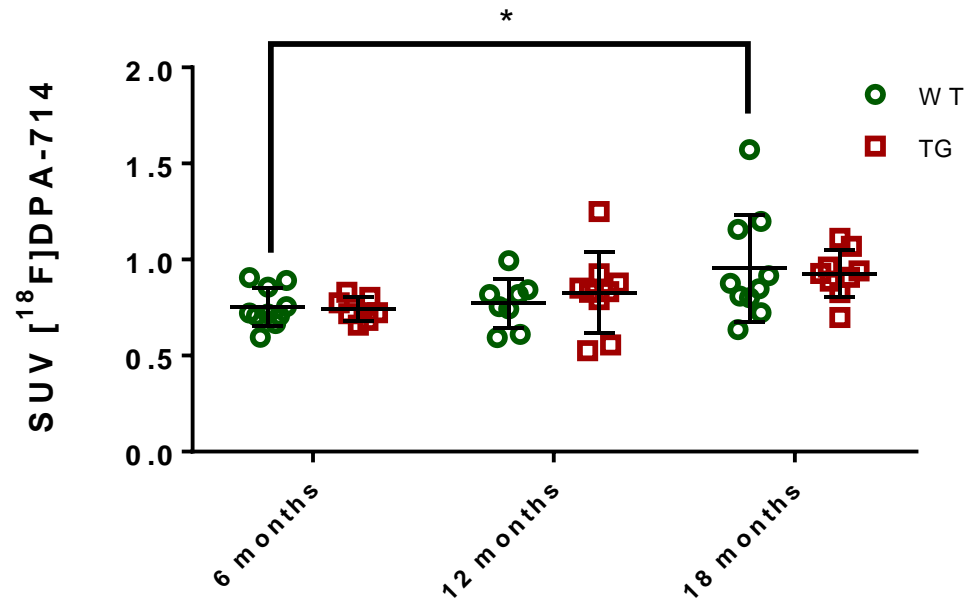

**Supplementary Figure 2:** [ $^{18}\text{F}$ ]DPA-714 standard uptake value in the cerebellum of WT and APP<sub>swe</sub>×PS1<sub>Δe9</sub> mice at 6 (WT n=10, TG=7), 12 (WT n=8, TG=9) and 18 months (WT n=10, TG=9) of age. Results are expressed as mean±SD. Statistical analysis was performed using two-way ANOVA followed by Sidak's post-hoc analysis (\*p≤0.05).

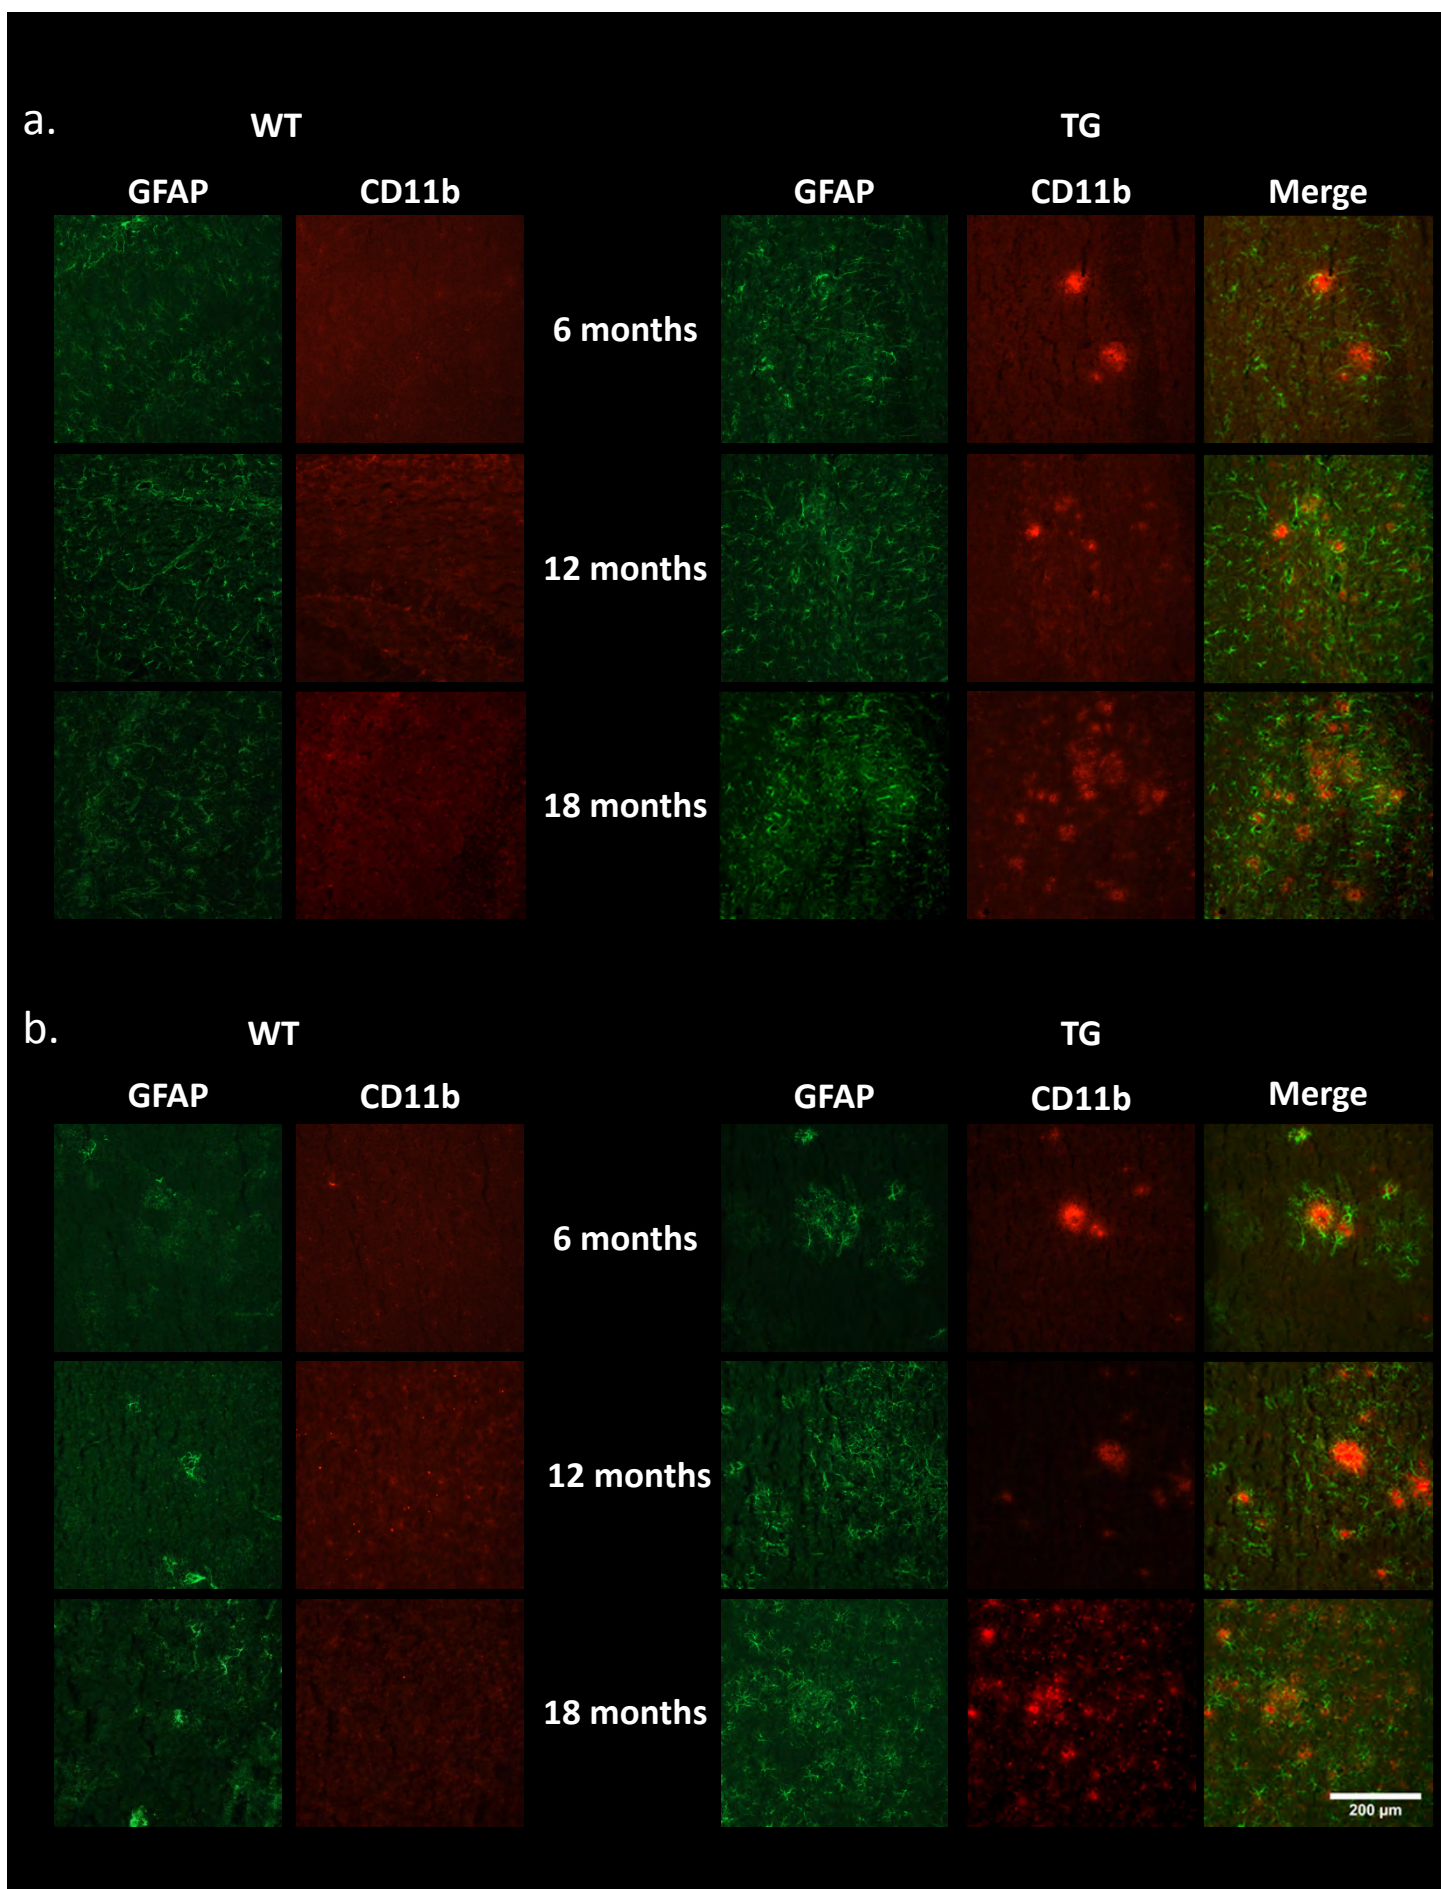

**Supplementary figure 3:** Immunoreactivity of GFAP (green) and CD11b (red). Representative images of double staining in the hippocampus (**a**) and cortex (**b**) of WT and APP<sub>Swe</sub>×PS1 $\Delta$ <sub>E9</sub> mice at 6, 12 and 18 months of age. Pictures were taken at 20 $\times$  magnification between bregma -2.06mm and -2.30mm. Scale bar represents 200 $\mu$ m.

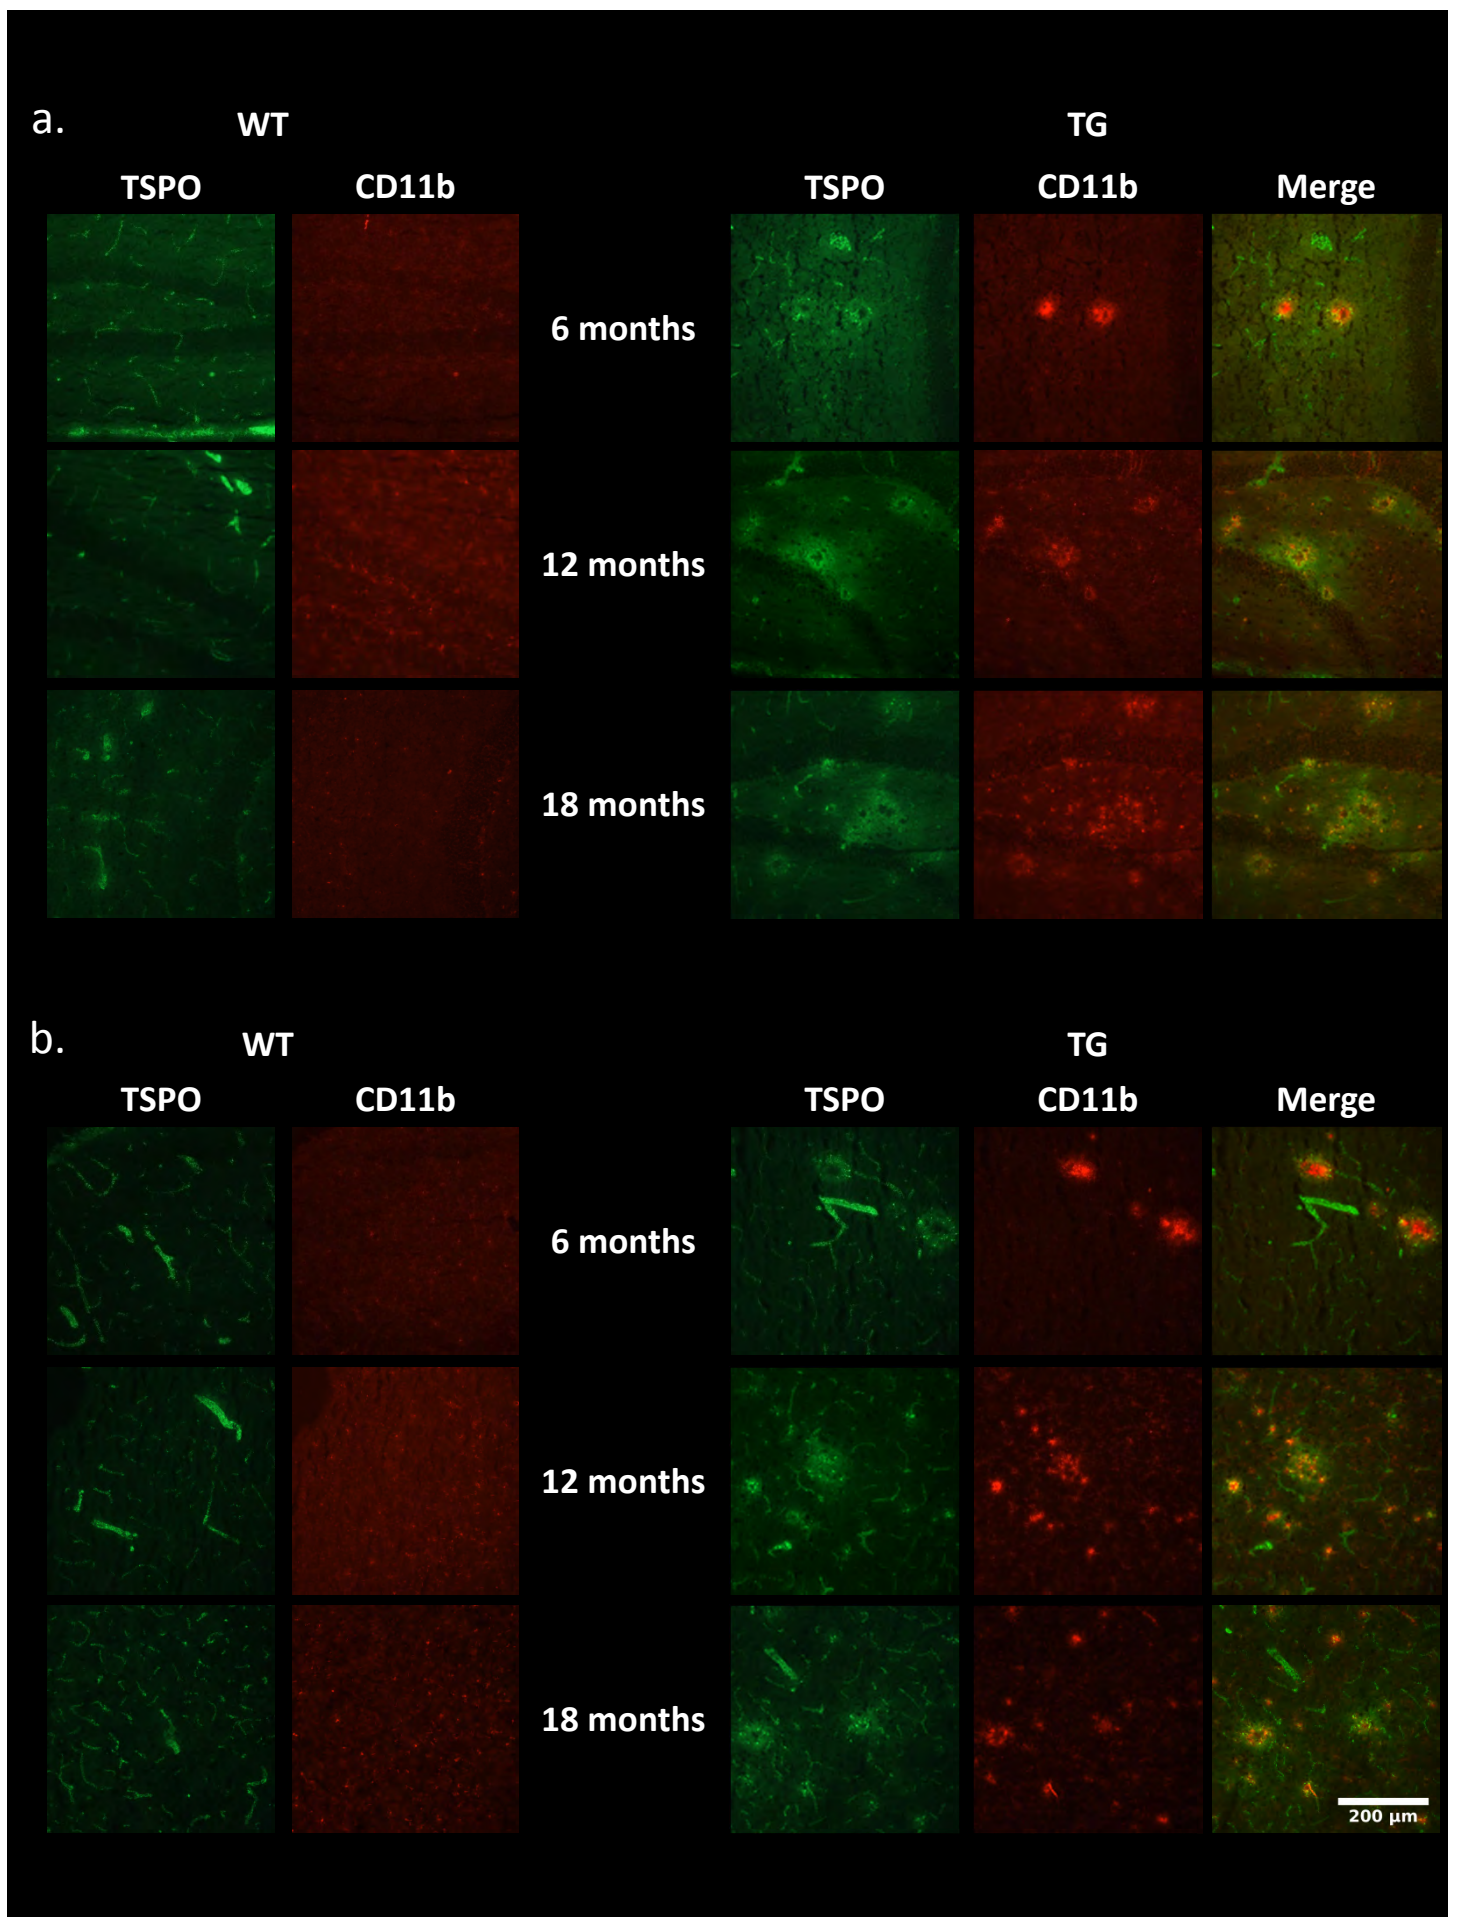

**Supplementary figure 4:** Immunoreactivity of TSPO (green) and CD11b (red). Representative images of double staining in the hippocampus (a) and cortex (b) of WT and APPsw $\times$ PS1 $\Delta$ e9 mice at 6, 12 and 18 months of age. Pictures were taken at 20 $\times$  magnification between bregma -2.06mm and -2.30mm. Scale bar represents 200 $\mu$ m.

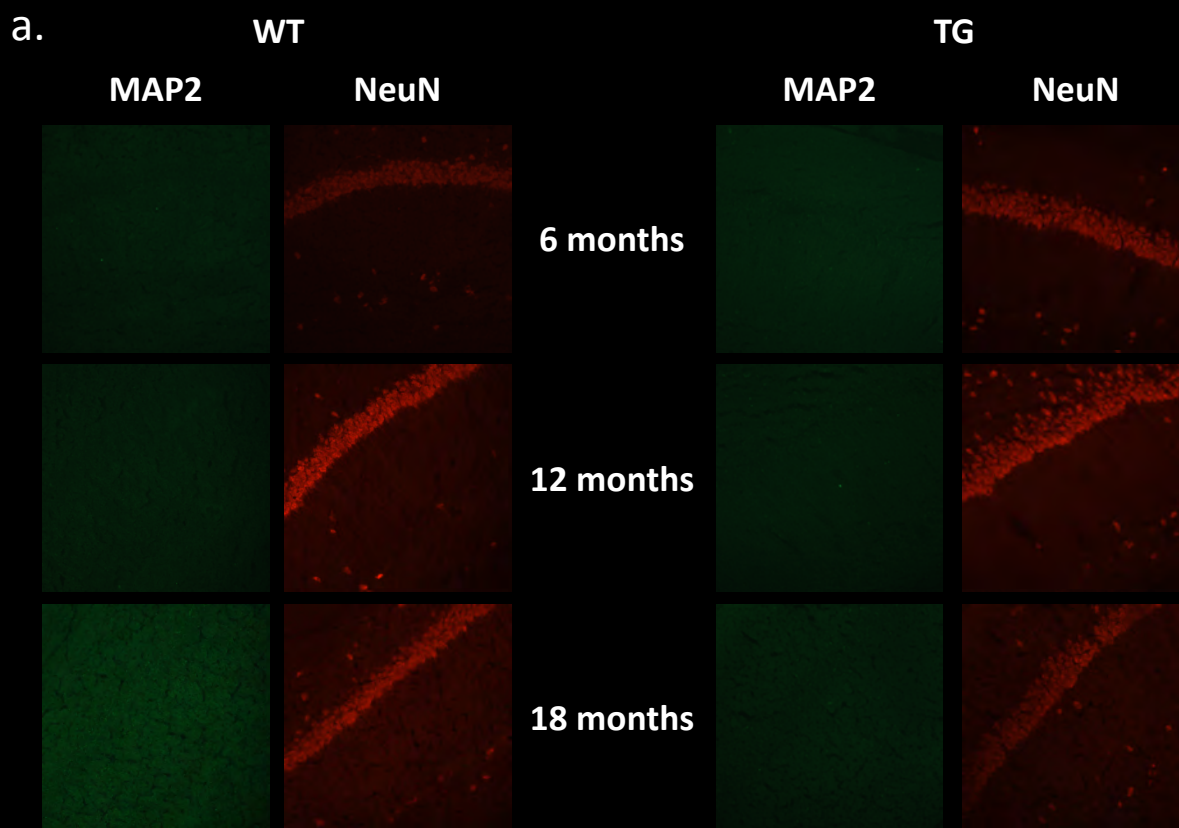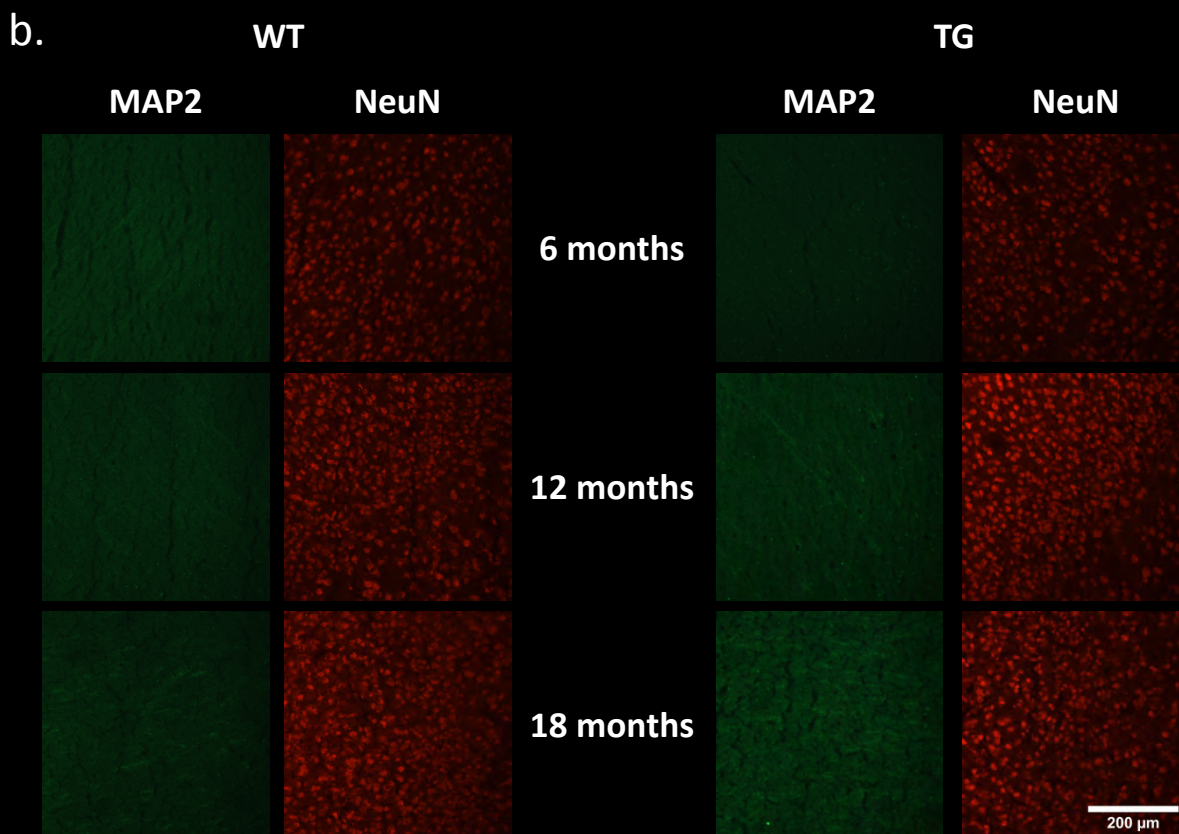

**Supplementary figure 5:** Immunoreactivity of MAP2 (green) and NeuN (red). Representative images of double staining in the hippocampus (a) and cortex (b) of WT and APP<sub>Swe</sub>×PS1 $\Delta$ <sub>E9</sub> mice at 6, 12 and 18 months of age. Pictures were taken at 20 $\times$  magnification between bregma -2.06mm and -2.30mm. Scale bar represents 200 $\mu$ m.
